# Supplementary material for: Cryptococcus neoformans Cda1 and Cda2 coordinate deacetylation of chitin during infection to control fungal virulence
Source: PubMed Central journal article supplement — Cell Surf. 2021 Oct 15;7:100066. doi: 10.1016/j.tcsw.2021.100066 (PMC8529172; doi:10.1016/j.tcsw.2021.100066), 2021-10-15
Supplement: mmc1.pdf [file mmc1.pdf]

**Table S1: Strains used in this study**

| <b>Deletions</b>        | <b>Resistance marker</b> | <b>Strain background</b>       | <b>Strain designation</b> | <b>Source</b>      |
|-------------------------|--------------------------|--------------------------------|---------------------------|--------------------|
| <i>cda1Δ</i>            | HYGR                     | KN99                           | LBCN369                   | Baker et al., 2007 |
| <i>cda1Δcda2Δ:A</i>     | HygR/NatR                | <i>cda1Δ</i>                   | LBCN401                   | Baker et al., 2007 |
| <i>cda1Δcda2Δ:B</i>     | HygR/NatR                | <i>cda1Δ</i>                   | LBCN635                   | Baker et al., 2007 |
| <i>cda1Δcda3Δ:A</i>     | HygR/PheR                | F1 <i>cda1Δ</i> X <i>cda3Δ</i> | LBCN496                   | Baker et al., 2007 |
| <i>cda1Δcda3Δ:B</i>     | HygR/PheR                | F1 <i>cda1Δ</i> X <i>cda3Δ</i> | LBCN525                   | Baker et al., 2007 |
| <i>cda2Δcda3Δ:A</i>     | NatR/PheR                | <i>cda3Δ</i>                   | LBCN458                   | Baker et al., 2007 |
| <i>cda2Δcda3Δ:B</i>     | PheR/G418R               | <i>cda3Δ</i>                   | NGCN927                   | Baker et al., 2007 |
| <i>cda1Δcda2Δ::CDA2</i> | HygR/G418R               | <i>cda1Δcda2Δ:A</i>            | JLCN952                   | This study         |

## A: CBA/J

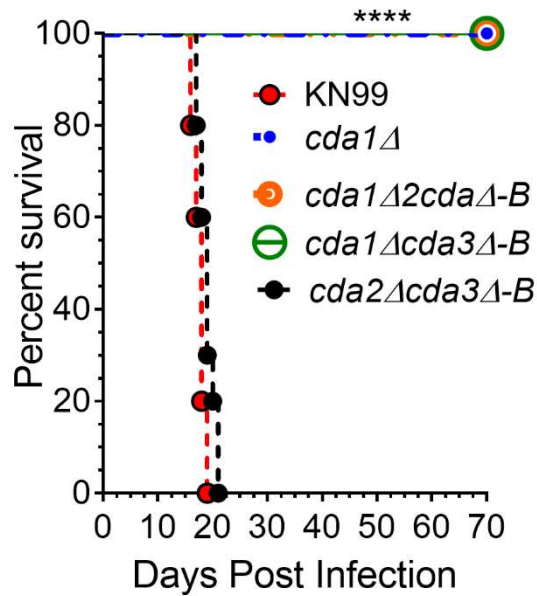

## B: 70 DPI

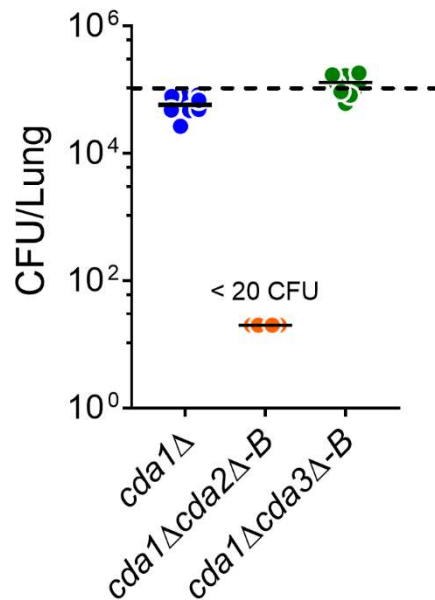

Fig. S1: **Deletion of *C. neoformans* CDA2 or CDA3 in conjunction with CDA1 significantly attenuates fungal virulence in CBA/J mice.** **A:** Survival curves of mice infected intranasally with an inoculum equivalent to 10<sup>5</sup> CFU of each strain (isolate B). Ten mice (6 to 8 weeks old, female) were used for each group and the data is a representative of two independent experiments. \*\*\*\*, *P* < 0.0001. Statistical analysis of survival rates was determined by log rank (Mantel-Cox) test. **B:** A solid line represents the median CFU per lung for each group. Each datum point represents one mouse's CFU (*n*=10). Lower limit of the detection is 20 CFU/lung. The dotted line represents CFU of the inoculum dose.

### A: YPD

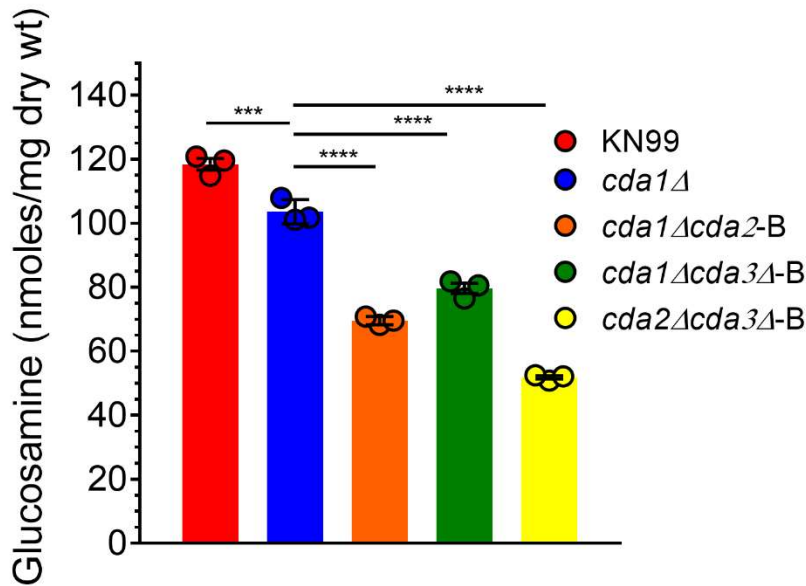

### B: RPMI

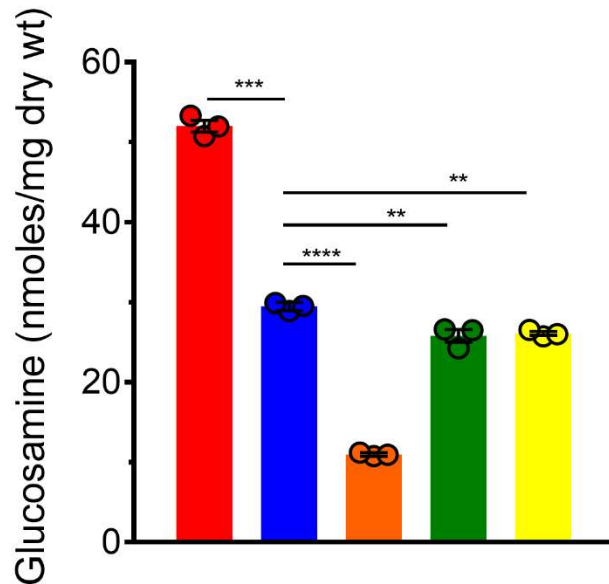

Fig. S2: **Deletion of *CDA2* in conjunction with *CDA1* further restricts chitosan production of *C. neoformans*.** Quantitative determination of chitosan by the MBTH assay extracted from the cell walls of wild-type KN99 and various double *CDA* deletion strains. **A:** Cells were grown in YPD for 48 h collected, washed and used for the assay. **B:** Strains were initially grown in YPD for 36 h, collected, washed and inoculated at a cell density of  $5 \times 10^5$  cells/mL into RPMI medium containing 10% FBS and incubated for 5 days at 37°C/5% CO<sub>2</sub>. Cells were collected, washed and used for chitosan measurement. Data is the mean of three biological and two technical replicates ( $n=3$ ). Significant differences between the groups were compared by one-way ANOVA followed by Bonferroni's multiple comparisons test. (\*\*\*\*= $p < 0.0001$  comparing chitosan amount of each strain to *cda1*Δ). Error bars represent standard errors of the mean.
